# Supplementary material
Source: publisher site journal article supplement (https://www.dovepress.com/article/307506)
Supplement: Supplementary file 1 [file get_supplementary_file.php]

**Supplementary 1.** The title and link of YouTube videos.

| Title | Link |
| --- | --- |
| Epidural Steroid Injections | <https://youtu.be/IMVLr9Z4XFU> |
| Epidural Steroid Injections for Chronic Back Pain | <https://youtu.be/KqL9gzVkAJQ> |
| Live Lumbar Transforaminal Epidural Steroid Injection for Pain Radiating Down the Leg | <https://youtu.be/Koq1t9RT9WM> |
| Lumbar Epidural Steroid Injection | <https://youtu.be/RfHfqVWsC54> |
| Complete Steroidal Epidural Injection Procedure for Sciatica | <https://youtu.be/biSCYrFXqxk> |
| Epidural Steroid Injection | <https://youtu.be/PnXEndn7h-c> |
| Epidural Steroid Injection for Sciatica | <https://youtu.be/Et2zKj4_QOA> |
| 5 Things to Know About Epidural Steroid Injections (602) 507-6550 | <https://youtu.be/MUmvdAq2Mgo> |
| Transforaminal Epidural Injection | <https://youtu.be/9NjJV7XhBB0> |
| Ease Chronic Back Pain With Epidural Steroid Injections | <https://youtu.be/4UFTMFD7yVo> |
| The Truth About Epidural Steroid Injections / Part 1 | <https://youtu.be/twfbHgT5870> |
| My First Experience with Epidural Steroid Injections | <https://youtu.be/Ao2lkCF754s> |
| Epidural Steroid Injection | <https://youtu.be/OgjGFAc8yO0> |
| Ultrasound-Guided Caudal Epidural Steroid Injection - SonoSite.mp4 | <https://youtu.be/MSZGDNyfV8M> |
| What You Should Know: Lumbar Epidural Steroid Injections | <https://youtu.be/aSloib_8edk> |
| Transforaminal Epidural Enjeksiyon | <https://youtu.be/PVyZabVTb50> |
| Transforaminal epidural with Dorsal Root Ganglion Pulsed Radiofrequency.즢 | <https://youtu.be/Tp2kgj9Pay8> |
| What to expect during an Epidural Steroid Injection at CDI | <https://youtu.be/qISsAcKFJqU> |
| Nokta Atışı - Transforminal Epidural Enjeksiyon (Bel Fıtığı Tedavisi) - Marmara Ağrı Merkezi | <https://youtu.be/YSFmD7mBJOc> |
| Lumbar Transforaminal Injection | <https://youtu.be/UdADg9l3ifc> |
| Lumbar Epidural Steroid Injection Animation. | <https://youtu.be/f4f4XaCiIto> |
| Fluoroscopic guided Lumbar epidural injection ( Right L4 nerve root) | <https://youtu.be/4BG6LA9iS5Y> |
| WATCH an Epidural Steroid Injection Demonstration - LIVE | <https://youtu.be/c820W5jybL0> |
| Epidural Steroid Injections Risks and Side Effects from an AZ Pain Clinic (602) 507-6550 | <https://youtu.be/1JTVeYpIFbE> |
| Lumbar Spine Epidural Steroid Injection Block transforaminal attorney videos | <https://youtu.be/q1SxPxx1otI> |
| Epidural Steroid Injections | <https://youtu.be/uoKSIP3rX3c> |
| Watch This Bilateral Transforaminal Injection Live by Dr. McJunkin | <https://youtu.be/IvA1VQD48Cc> |
| Epidural Steroid Injections are Dangerous for Neck & Back Pain Relief -- Dr Mandell | <https://youtu.be/OsNRasY5KZk> |
| Lumbar Epidural Steroid Injection | <https://youtu.be/TJxf4P9iVRc> |
| Lumbar Epidural Steroid Injection (LESI) | <https://youtu.be/kLhCE21RWMk> |
| Lumbar Transforaminal Epidural Steroid Injection | <https://youtu.be/eiPffFE2iDE> |
| Discharge Following Epidural Injection - Dr. Thomas Jarecky | <https://youtu.be/kGu25xlQ0Eg> |
| Epidural Steroid Injections at CDA Spine | <https://youtu.be/xKVYXi1egY8> |
| Epidural Steroid Injection | <https://youtu.be/KJX1yHlxi2I> |
| Transforaminal Steroid Epidural Injection | <https://youtu.be/CXnd3uH1YBk> |
| The Pain Show - Sciatica & Epidural Steroid Injections | <https://youtu.be/msB44a30rtI> |
| Epidural Steroid Injection: Chronic Pain Series: Vlog 2 | <https://youtu.be/7rvkQozlu5A> |
| Selective Nerve Root Block ot Transforaminal Epidural Steroid Injection | <https://youtu.be/jD3VsRvi8UY> |
| Lumbar Epidural Injection | <https://youtu.be/67lgoY06rSU> |
| Epidural Steroid Injection Procedure by Eddy Feliz M.D. | <https://youtu.be/XnItOqA9qHc> |
| Dr. Pietro Memmo - Transforaminal Epidural Injection | <https://youtu.be/u6RIIOsjyZc> |
| Epidural Steroid Injections for Sciatica and Pinched Nerves (602) 507-6550 | <https://youtu.be/z76psD0yH9g> |
| Bilateral Transforaminal Epidural Steroid Injection - Offered in Las Vegas, Nevada | <https://youtu.be/tl8wD4krDFI> |
| Epidural Steroid Injections for Spinal Stenosis (602) 507-6550 | <https://youtu.be/ZV8FauAPvLE> |
| Lumbar Epidural Steroid Injection at KOPI | <https://youtu.be/-o__EkyQ7rg> |
| Epidural Steroid Injection | <https://youtu.be/xiKUZIJnw7k> |
| Epidural Steroid Injection - Week 1 Results | <https://youtu.be/DlFxdT08aIQ> |
| UCSF Radiology: Common Spine Injection Procedures | <https://youtu.be/O5pOhuaMBdM> |
| Lumbar Epidural Steroid Injection Dr Scott Naftulin | <https://youtu.be/Y0RJmTJ8960> |
| L4-L5 epidural injection | <https://youtu.be/ampjSbLUhtQ> |
